# Supplementary material
Source: PubMed Central journal article supplement (PMC8068576)
Supplement: NIHMS1651669-supplement-1.pdf [file NIHMS1651669-supplement-1.pdf]

**Supplemental Table 1. Expression of pericyte specific and non-specific genes in normal and immortalized HLPC**

| Average Ct Values for Indicated Genes |           |      |           |           |           |           |
|---------------------------------------|-----------|------|-----------|-----------|-----------|-----------|
| Group                                 | GAPDH     | GLI1 | ABCG2     | Desmin    | Nestin    | ANG1      |
| Normal HLPC                           | 21.75±0.2 | ND   | 35.68±0.1 | 34.15±0.4 | 30.94±0.4 | 25.04±0.1 |
| Immortalized HLPC                     | 21.93±0.2 | ND   | 36.18±0.2 | 34.14±0.4 | 31.87±0.4 | 24.64±0.4 |

N=3. HLPC: human lung pericytes; ABCG2: ATP-binding cassette super-family G member 2;

ANG1: angiopoietin 1; ND: not detectable.

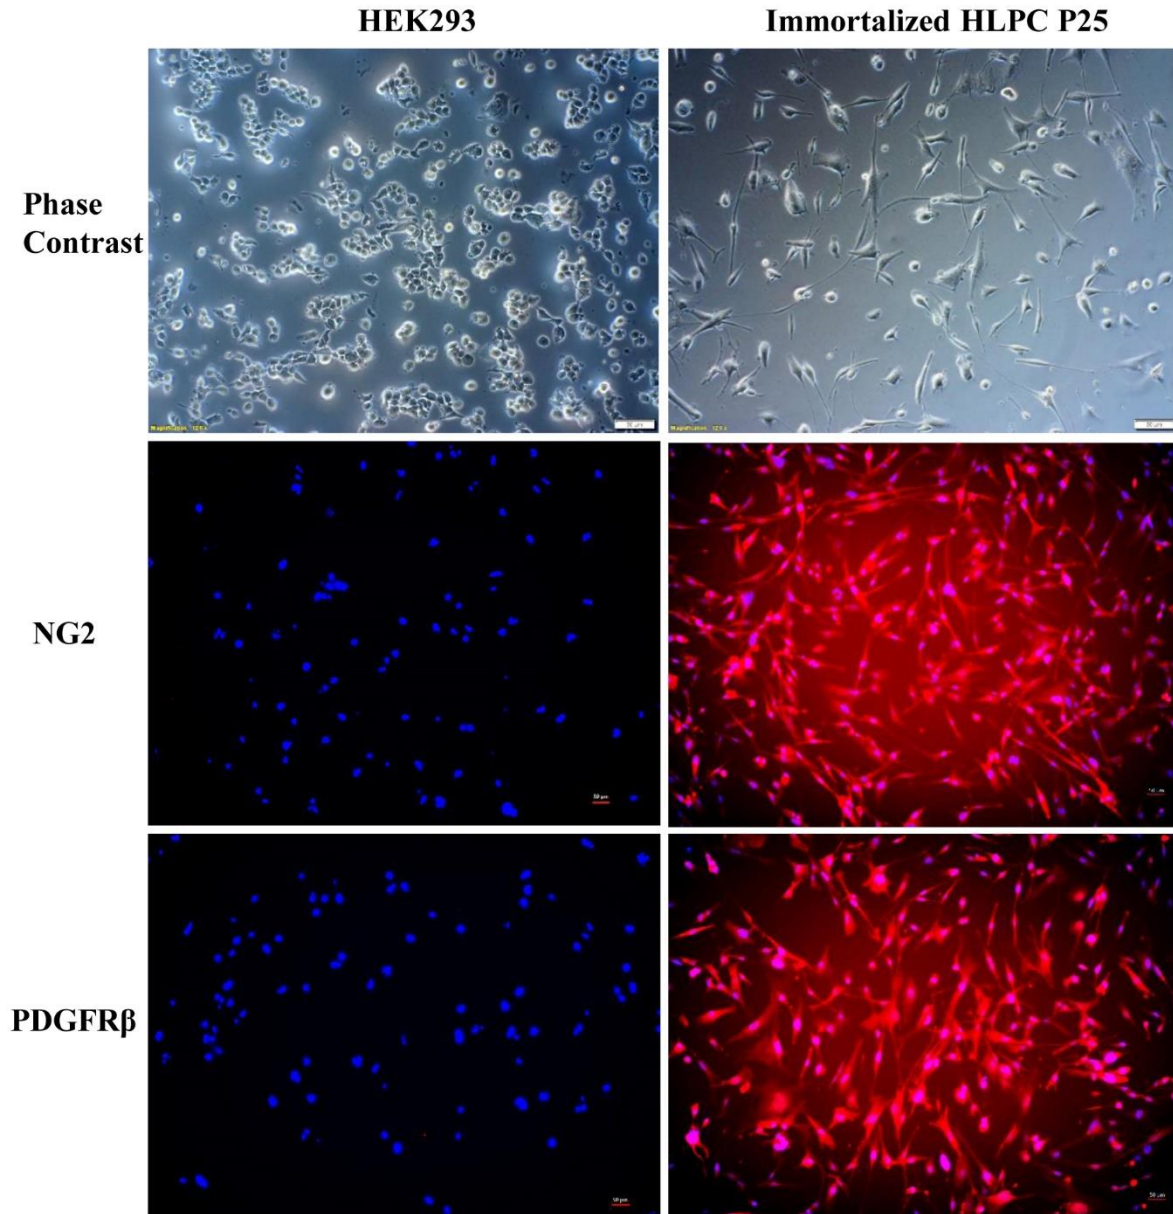

**Supplemental Figure 1: Immortalized human lung pericytes express pericyte markers.** The morphology of HEK293 cells and immortalized human lung pericyte (P25) were assessed by phase contrast light microscopy. These cells were also assessed by immunostaining for PDGFR $\beta$  and neural glial antigen-2 (NG2). Nucleus stained blue and PDGFR $\beta$  or NG2 stained red. Scale bar: 50  $\mu$ m. HEK293 cells were used as negative control for immunostaining as they barely express PDGFR $\beta$  or NG2. HLPC: human lung pericytes.

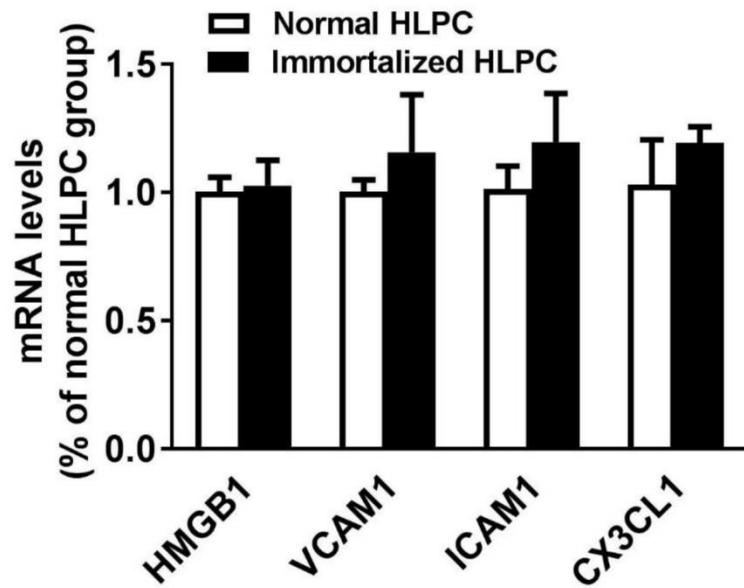

**Supplemental Figure 2: Inflammatory gene expression in normal and immortalized human lung pericytes.** Total RNA was extracted from normal (P7) and immortalized human lung pericytes (P25). The mRNA levels of HMGB1, VCAM1, ICAM1 and CX3CL1 were measured by Real-time PCR. N=3 independent experiments. HLPC: human lung pericytes.
